# Supplementary material for: Patient and public involvement in numerical aspects of trials: a mixed methods theory-informed survey of trialists’ current practices, barriers and facilitators
Source: HighWire-hosted journal article supplement (doi:10.1136/bmjopen-2020-046977), 2021-03-01
Supplement: bmjopen-2020-046977supp002_data_supplement.pdf [file bmjopen-2020-046977supp002_data_supplement.pdf]

Supplementary Table 1 – Demographic characteristics by respondent status (respondents were defined as participants that replied to demographic characteristics and all theoretical domains framework questions; non-respondents were those that replied to demographic questions only)

|                                                                         | Respondents<br>(N=187) | Non-respondents<br>(N=99) |
|-------------------------------------------------------------------------|------------------------|---------------------------|
| <b>Age</b>                                                              |                        |                           |
| 18-24 years old                                                         | 2 (1.1)                | 3 (3.0)                   |
| 25-34 years old                                                         | 62 (33.2)              | 27 (27.3)                 |
| 35-44 years old                                                         | 50 (26.7)              | 35 (35.4)                 |
| 45-54 years old                                                         | 41 (21.9)              | 20 (20.2)                 |
| 55-64 years old                                                         | 22 (11.8)              | 9 (9.1)                   |
| 65+ years old                                                           | 7 (3.7)                | 4 (4.0)                   |
| Rather not say                                                          | 3 (1.6)                | 1 (1.0)                   |
| <b>Gender</b>                                                           |                        |                           |
| Female                                                                  | 130 (69.5)             | 82 (82.8)                 |
| Male                                                                    | 50 (26.7)              | 17 (17.2)                 |
| Other                                                                   | 2 (1.1)                |                           |
| Prefer not to say                                                       | 5 (2.7)                |                           |
| <b>Work location</b>                                                    |                        |                           |
| England                                                                 | 17 (9.1)               | 10 (10.1)                 |
| North East England                                                      | 7 (3.7)                | 3 (3.0)                   |
| North West England                                                      | 14 (7.5)               | 7 (7.1)                   |
| Yorkshire and the Humber                                                | 13 (7.0)               | 11 (11.1)                 |
| West Midlands                                                           | 12 (6.4)               | 1 (1.0)                   |
| East Midlands                                                           | 7 (3.7)                | 6 (6.1)                   |
| South West England                                                      | 11 (5.9)               | 6 (6.1)                   |
| South East England                                                      | 19 (10.2)              | 10 (10.1)                 |
| London                                                                  | 33 (17.6)              | 18 (18.2)                 |
| East England                                                            | 4 (2.1)                | 3 (3.0)                   |
| Northern Ireland                                                        | 6 (3.2)                | 5 (5.1)                   |
| Scotland                                                                | 30 (16.0)              | 16 (16.2)                 |
| Wales                                                                   | 14 (7.5)               | 3 (3.0)                   |
| <b>Which aspects of the trial process are you directly involved in?</b> |                        |                           |
| Trial design                                                            | 88 (47.1)              | 51 (51.5)                 |
| Undertaking the trial                                                   | 85 (45.5)              | 50 (50.5)                 |
| Dissemination                                                           | 89 (47.6)              | 39 (39.4)                 |
| Analysis                                                                | 59 (31.6)              | 24 (24.2)                 |
| Overseeing committee                                                    | 5 (2.7)                | 1 (1.0)                   |
| All stages                                                              | 75 (40.1)              | 25 (25.3)                 |
| None                                                                    |                        | 1 (1.0)                   |
| <b>Main role in trial</b>                                               |                        |                           |
| Trial manager                                                           | 125 (66.8)             | 69 (69.7)                 |
| Chief investigator                                                      | 3 (1.6)                |                           |
| Statistician                                                            | 29 (15.5)              | 8 (8.1)                   |
| Health economist                                                        | 3 (1.6)                | 3 (3.0)                   |
| Qualitative researcher                                                  | 8 (4.3)                |                           |
| Patient Partner                                                         | 8 (4.3)                | 3 (3.0)                   |
| Co-investigator                                                         | 16 (8.6)               | 10 (10.1)                 |

|                                                                                       |            |           |
|---------------------------------------------------------------------------------------|------------|-----------|
| Researcher                                                                            | 7 (3.7)    | 6 (6.1)   |
| Systematic reviewer                                                                   | 1 (0.5)    |           |
| Programmer                                                                            |            | 1 (1.0)   |
| PPI lead                                                                              | 3 (1.6)    | 4 (4.0)   |
| Don't work in a trial                                                                 |            | 2 (2.0)   |
| Missing                                                                               | 63 (33.2)  | 30 (30.3) |
| <b>How long have you been working in trials?</b>                                      |            |           |
| Less than 5 years                                                                     | 57 (30.5)  | 35 (35.4) |
| Between 5-10 years                                                                    | 61 (32.6)  | 28 (28.3) |
| More than 10 years                                                                    | 69 (36.9)  | 36 (36.4) |
| <b>When do you involve patient or public partners in numerical aspects of trials?</b> |            |           |
| Never                                                                                 | 7 (3.7)    | 7 (7.1)   |
| Rarely                                                                                | 23 (12.3)  | 18 (18.2) |
| Regularly                                                                             | 109 (58.3) | 57 (57.6) |
| Every day                                                                             | 48 (25.7)  | 11 (11.1) |
| Missing                                                                               |            | 6 (6.1)   |
| <b>Do you involve patient or public partners in the numerical aspects of trials?</b>  |            |           |
| Yes                                                                                   | 116 (62.0) | 18 (18.2) |
| No                                                                                    | 48 (25.7)  | 6 (6.1)   |
| Don't know                                                                            | 23 (12.3)  | 3 (3.0)   |
| Missing                                                                               |            | 72 (72.7) |

Supplementary Table 2 – Responses to the Theoretical Domains Framework questions by whether respondent said they involved patient and public partners (PPP) in numerical aspects of trials – median (percentile 25 – percentile 75), count for scale variables or n (%) out of N for binary variables

|                                                                                                                                 | Respondents involve PPP (N=116) | Respondents do not involve PPP or are not sure (N=71) |
|---------------------------------------------------------------------------------------------------------------------------------|---------------------------------|-------------------------------------------------------|
| <b>TDF domain: Knowledge</b>                                                                                                    |                                 |                                                       |
| How familiar are you with involving PPP in numerical aspects of trials?                                                         | 4 (3.0-5.0),116                 | 2 (1.0-3.0),71                                        |
| <b>TDF domain: Skills</b>                                                                                                       |                                 |                                                       |
| Grade your own ability to involve PPP in numerical aspects of trials                                                            | 4 (3.0-5.0),116                 | 2 (1.0-4.0),71                                        |
| <b>TDF domain: Social / professional role</b>                                                                                   |                                 |                                                       |
| Is involving PPP in numerical aspects of trials an expected role within your job?                                               | 46 (39.7)                       | 3 (4.2)                                               |
| <b>TDF domain: Beliefs about capability</b>                                                                                     |                                 |                                                       |
| Do you feel confident in your ability to involve PPP in numerical aspects of trials?                                            | 4 (3.0-5.0),111                 | 3 (2.0-4.0),62                                        |
| Do you think that involving PPP in numerical aspects of trials is hard to deliver?                                              | 52 (44.8)                       | 34 (47.9)                                             |
| <b>TDF domain: Optimism</b>                                                                                                     |                                 |                                                       |
| Involving PPP in numerical aspects of trials is a good thing                                                                    | 6 (5.0-7.0),108                 | 5 (4.0-6.0),61                                        |
| <b>Do you think involving patient or partners in numerical aspects of a trial can have a positive impact on the researcher?</b> |                                 |                                                       |
| Yes                                                                                                                             | 96 (82.8)                       | 43 (60.6)                                             |
| No impact                                                                                                                       | 5 (4.3)                         | 11 (15.5)                                             |
| Negative impact                                                                                                                 | 1 (0.9)                         | 2 (2.8)                                               |
| Missing                                                                                                                         | 14 (12.1)                       | 15 (21.1)                                             |
| <b>on the quality of the trial?</b>                                                                                             |                                 |                                                       |
| Yes                                                                                                                             | 93 (80.2)                       | 46 (64.8)                                             |
| No impact                                                                                                                       | 8 (6.9)                         | 9 (12.7)                                              |
| Negative impact                                                                                                                 | 1 (0.9)                         | 1 (1.4)                                               |
| Missing                                                                                                                         | 14 (12.1)                       | 15 (21.1)                                             |
| <b>on the patient partner?</b>                                                                                                  |                                 |                                                       |
| Yes                                                                                                                             | 95 (81.9)                       | 50 (70.4)                                             |
| No impact                                                                                                                       | 6 (5.2)                         | 4 (5.6)                                               |
| Negative impact                                                                                                                 | 1 (0.9)                         | 2 (2.8)                                               |
| Missing                                                                                                                         | 14 (12.1)                       | 15 (21.1)                                             |
| <b>TDF domain: beliefs about consequences</b>                                                                                   |                                 |                                                       |
| There is a good balance between the challenges of involving PPP in numerical aspects of trials and the potential benefits       | 68 (58.6)                       | 22 (31.0)                                             |
| <b>TDF domain: Reinforcement</b>                                                                                                |                                 |                                                       |
| You get recognition from PPP, when you involve them in numerical aspects of trials                                              | 35 (30.2)                       | 12 (16.9)                                             |
| You get recognition from work peers                                                                                             | 21 (18.1)                       | 5 (7.0)                                               |

|                                                                                                                   |                |                |
|-------------------------------------------------------------------------------------------------------------------|----------------|----------------|
| You get recognition from your manager                                                                             | 23 (19.8)      | 6 (8.5)        |
| <b>TDF domain: Intention</b>                                                                                      |                |                |
| <b>Will you involve PPP in numerical aspects of your next project?</b>                                            |                |                |
| Yes definitely                                                                                                    | 41 (35.3)      | 4 (5.6)        |
| Yes probably                                                                                                      | 42 (36.2)      | 16 (22.5)      |
| No definitely                                                                                                     | 0              | 1 (1.4)        |
| No probably                                                                                                       | 4 (3.4)        | 9 (12.7)       |
| I don't know                                                                                                      | 12 (10.3)      | 24 (33.8)      |
| Missing                                                                                                           | 17 (14.7)      | 17 (23.9)      |
| <b>TDF domain: Goals</b>                                                                                          |                |                |
| Working on something else on my agenda is a higher priority than involving PPP in the numerical aspects of trials | 4 (3.0-5.0),99 | 5 (4.0-6.0),54 |
| <b>TDF domain: Memory, attention, decision process</b>                                                            |                |                |
| Involving PPP in numerical aspects of trials is something I do automatically                                      | 4 (3.0-6.0),93 | 2 (1.0-2.5),52 |
| <b>TDF domain: Environmental context and resources</b>                                                            |                |                |
| Have the resources needed to involve PPP in numerical aspects of trials                                           | 55 (47.4)      | 16 (22.5)      |
| Employer provides support to involve PPP in numerical aspects of trials                                           | 47 (40.5)      | 13 (18.3)      |
| Employer provides training to involve PPP in numerical aspects of trials                                          | 31 (26.7)      | 7 (9.9)        |
| Involving PPP in numerical aspects of trials is compatible with daily practice                                    | 63 (54.3)      | 17 (23.9)      |
| PPP are motivated to get involved in numerical aspects of trials                                                  | 59 (50.9)      | 14 (19.7)      |
| <b>TDF domain: Social influences</b>                                                                              |                |                |
| Most people who are important think I should involve PPP in numerical aspects of trials                           | 5 (4.0-6.0),94 | 3 (1.0-4.0),50 |
| <b>Who encourages you to involve PPP in numerical aspects?</b>                                                    |                |                |
| Myself                                                                                                            | 63 (54.3)      | 15 (21.1)      |
| Co-workers                                                                                                        | 45 (38.8)      | 11 (15.5)      |
| Manager                                                                                                           | 44 (37.9)      | 10 (14.1)      |
| Social media                                                                                                      | 14 (12.1)      | 6 (8.5)        |
| My personal environment                                                                                           | 18 (15.5)      | 1 (1.4)        |
| Scientific literature                                                                                             | 31 (26.7)      | 15 (21.1)      |
| Public                                                                                                            | 24 (20.7)      | 9 (12.7)       |
| Institution                                                                                                       | 38 (32.8)      | 10 (14.1)      |
| Regulation                                                                                                        | 22 (19.0)      | 15 (21.1)      |
| Mass media                                                                                                        | 3 (2.6)        | 3 (4.2)        |
| No encouragement                                                                                                  | 7 (6.0)        | 14 (19.7)      |
| <b>Who is a barrier for you to involve PPP in numerical aspects?</b>                                              |                |                |
| Myself                                                                                                            | 6 (5.2)        | 7 (9.9)        |
| Co-workers                                                                                                        | 4 (3.4)        | 7 (9.9)        |

|                                                                                  |                |                |
|----------------------------------------------------------------------------------|----------------|----------------|
| Manager                                                                          | 6 (5.2)        | 10 (14.1)      |
| Scientific literature                                                            | 2 (1.7)        | 3 (4.2)        |
| Social media                                                                     | 2 (1.7)        |                |
| My personal environment                                                          | 11 (9.5)       | 6 (8.5)        |
| Public                                                                           | 5 (4.3)        | 7 (9.9)        |
| Institution                                                                      | 13 (11.2)      | 13 (18.3)      |
| Regulation                                                                       | 10 (8.6)       | 5 (7.0)        |
| Mass media                                                                       | 5 (4.3)        | 3 (4.2)        |
| No barrier                                                                       | 47 (40.5)      | 13 (18.3)      |
| <b>TDF domain: Emotions</b>                                                      |                |                |
| <b>Emotions related to involving PPP in numerical aspects</b>                    |                |                |
| Optimism                                                                         | 65 (56.0)      | 29 (40.8)      |
| Ease                                                                             | 18 (15.5)      | 5 (7.0)        |
| Calm                                                                             | 14 (12.1)      | 3 (4.2)        |
| Relaxation                                                                       | 3 (2.6)        | 3 (4.2)        |
| Appreciation                                                                     | 71 (61.2)      | 32 (45.1)      |
| Nervousness                                                                      | 37 (31.9)      | 18 (25.4)      |
| Pessimism                                                                        | 7 (6.0)        | 12 (16.9)      |
| Depression                                                                       |                | 2 (2.8)        |
| Agitation                                                                        | 9 (7.8)        | 11 (15.5)      |
| Happiness                                                                        | 27 (23.3)      | 8 (11.3)       |
| Sadness                                                                          | 2 (1.7)        | 2 (2.8)        |
| Anxiety                                                                          | 25 (21.6)      | 17 (23.9)      |
| <b>TDF domain: Behavioural regulation</b>                                        |                |                |
| <b>Do you have a clear plan on...</b>                                            |                |                |
| Which numerical aspects of trials you should involve PPP with?                   | 33 (28.4)      | 5 (7.0)        |
| How you will involve PPP in numerical aspects of trials?                         | 36 (31.0)      | 6 (8.5)        |
| How often will you involve PPP in numerical aspects of trials?                   | 37 (31.9)      | 4 (5.6)        |
| <b>TDF domain: Nature of behaviour</b>                                           |                |                |
| Involve PPP in numerical aspects of trials without consciously thinking about it | 4 (2.0-5.0),90 | 2 (1.0-3.5),48 |
